# Supplementary material for: Design of ZIF-based hybrid nanoparticles with hyaluronic acid-augmented ROS behavior for dual-modality PA/NIR-II FL imaging
Source: Royal Society of Chemistry journal article supplement (doi:10.1039/d0ra09545a), 2021-01-01
Supplement: d0ra09545a1.pdf [file d0ra09545a1.pdf]

## Supplementary Material

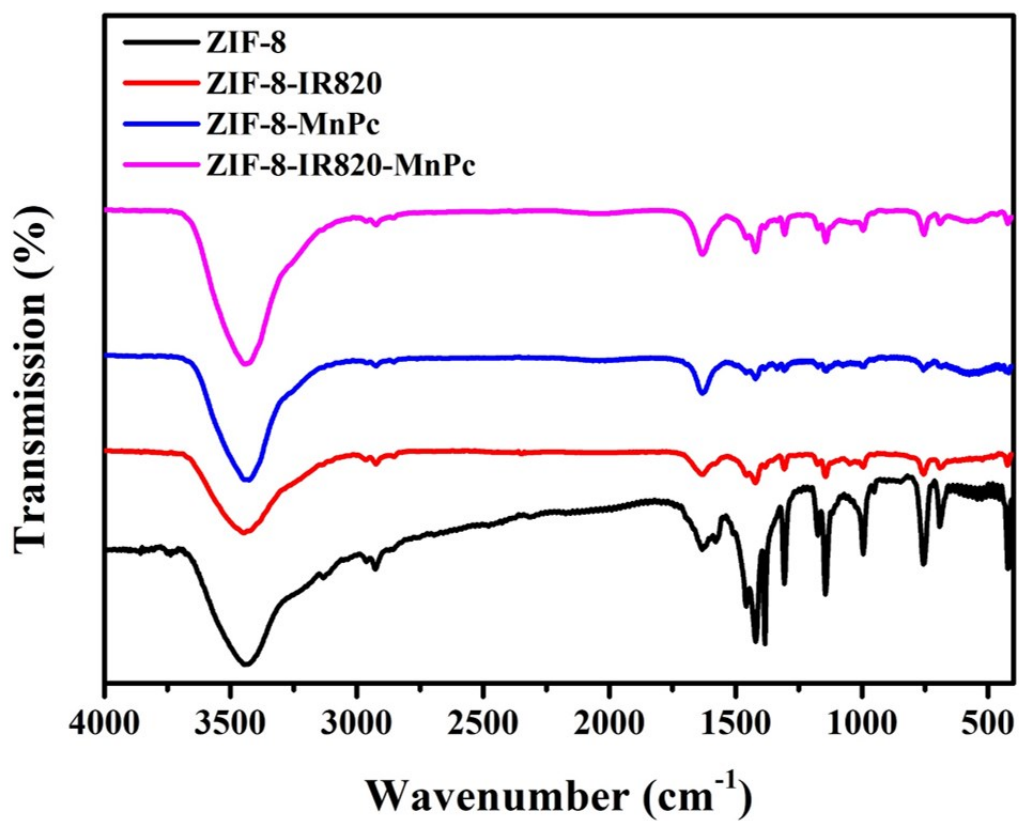

**Fig. S1** The FTIR spectrum of ZIF-8, ZIF-8-IR820, ZIF-8-MnPc and ZIF-8-IR820-MnPc.

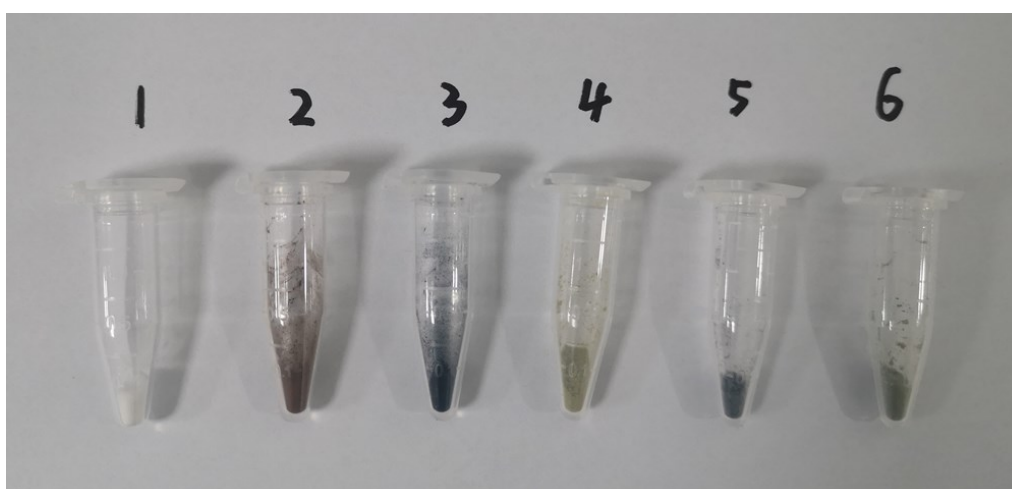

**Fig. S2** Photos of ZIF-8, IR820, MnPc, ZIF-8-IR820, ZIF-8-MnPc and ZIF-8-IR820-MnPc, respectively.

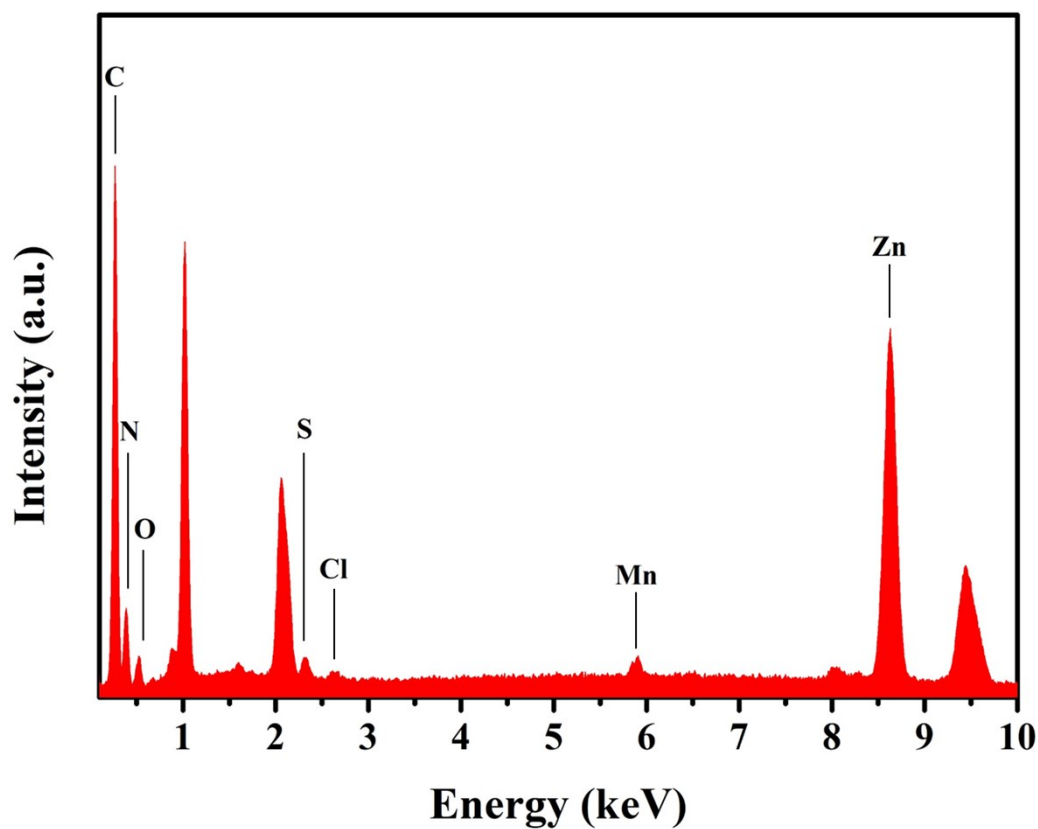

**Fig. S3** The energy dispersive X-ray spectrum of ZIF-8-IR820-MnPc.

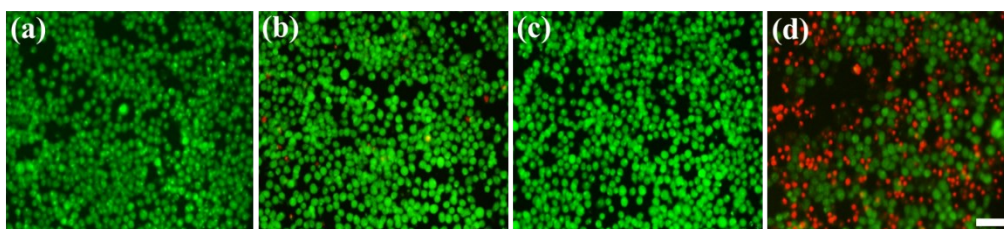

**Fig. S4** All the cells were dyed by calcein-AM/PI with live/dead assays under different conditions. (a) Control. (b) ZIMH NPs only. (c) 808 nm

laser irradiation for 5 min only. (d) ZIMH NPs plus 808 nm laser irradiation for 5 min. Scale bar: 75  $\mu\text{m}$ .
